# Supplementary material
Source: PubMed Central journal article supplement (PMC3358570)
Supplement: NIHMS373959-supplement-1_si_001.pdf [file NIHMS373959-supplement-1_si_001.pdf]

## Supporting Information

### Ag<sub>2</sub>S Quantum Dot: A Bright and Biocompatible Fluorescent Nanoprobe in the Second Near-Infrared Window

Yan Zhang<sup>1§</sup>, Guosong Hong<sup>2§</sup>, Yejun Zhang<sup>1§</sup>, Guangcun Chen<sup>1</sup>, Feng Li<sup>1</sup>, Hongjie Dai<sup>2\*</sup>, and Qiangbin Wang<sup>1\*</sup>

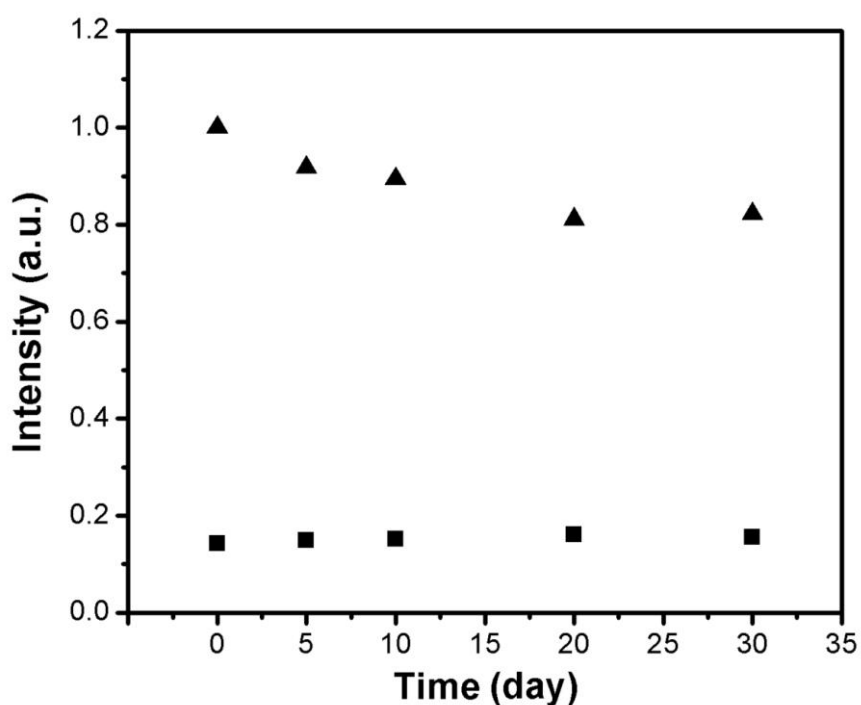

**Figure S1.** The photostability of the as-prepared original hydrophobic 5.4 nm Ag<sub>2</sub>S QDs (▲) and the hydrophilic DHLA-Ag<sub>2</sub>S QDs after ligand-exchange (■) in 30 days. It was observed that the PL intensity of the hydrophobic Ag<sub>2</sub>S QDs was stabilized at 85 % of its original PL intensity in 30 days and the PL intensity of the hydrophilic Ag<sub>2</sub>S QDs kept constant in 30 days. It was noticeable that the PL intensity of Ag<sub>2</sub>S QDs decreased 7 times after the ligand-exchange process, which is similar to the behavior of CdSe QDs. This figure was plotted by normalizing the PL intensity of the hydrophilic DHLA-Ag<sub>2</sub>S QDs (■) to the hydrophobic Ag<sub>2</sub>S QDs (▲).

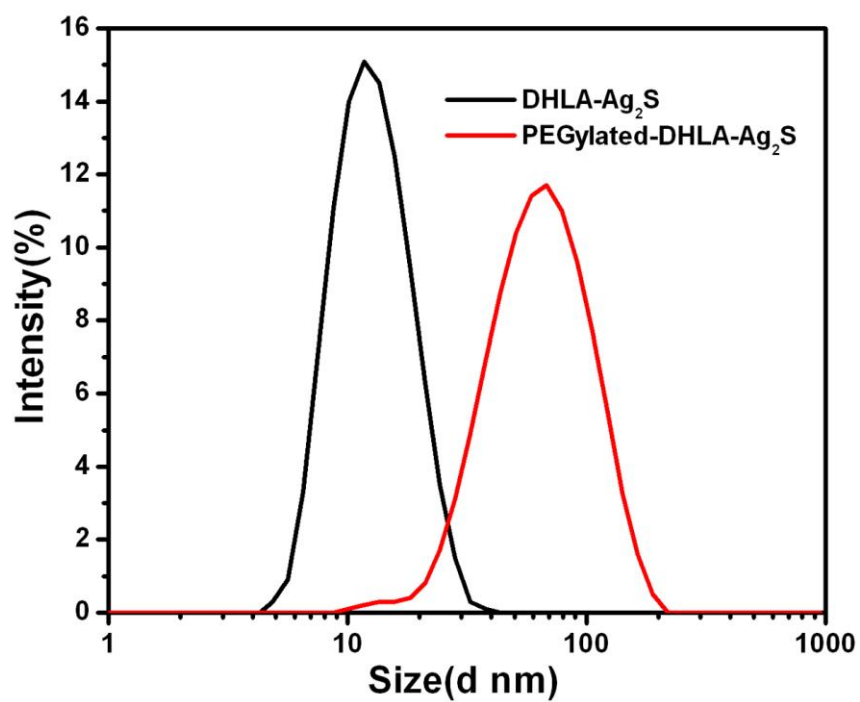

**Figure S2.** The hydrodynamic diameters of DHLA-Ag<sub>2</sub>S QDs and PEGylated- DHLA-Ag<sub>2</sub>S QDs. The average hydrodynamic diameter of DHLA-Ag<sub>2</sub>S and PEGylated-DHLA-Ag<sub>2</sub>S is 11.8 nm and 56.53 nm, respectively.

|                                   | Mean (mV)            | Area (%) | Width (mV) |
|-----------------------------------|----------------------|----------|------------|
| <b>Zeta Potential (mV):</b> -29.1 | <b>Peak 1:</b> -29.1 | 100.0    | 3.94       |
| <b>Zeta Deviation (mV):</b> 3.94  | <b>Peak 2:</b> 0.00  | 0.0      | 0.00       |
| <b>Conductivity (mS/cm):</b> 2.49 | <b>Peak 3:</b> 0.00  | 0.0      | 0.00       |

**Result quality:** Good

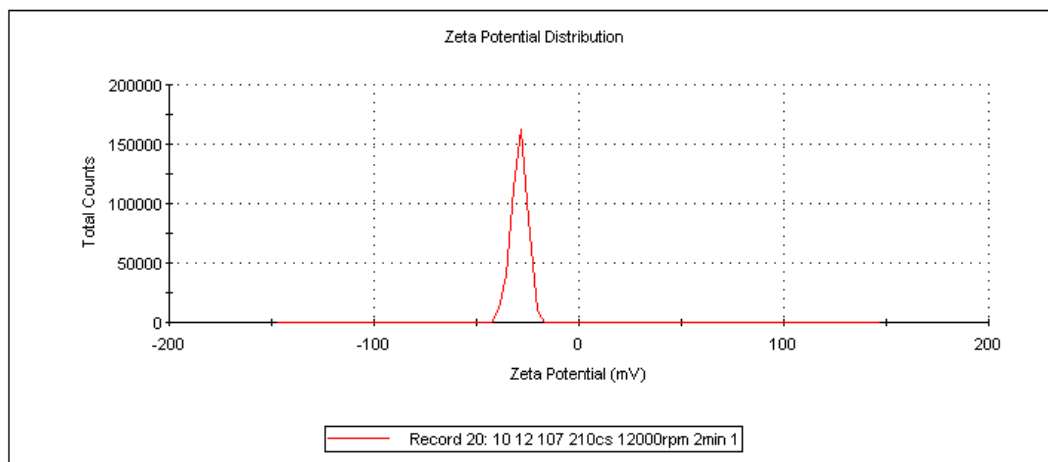

**Figure S3.** Zeta potential of DHLA-Ag<sub>2</sub>S QDs (-29.1 mV).

|                                     | Mean (mV)           | Area (%) | Width (mV) |
|-------------------------------------|---------------------|----------|------------|
| <b>Zeta Potential (mV):</b> 3.93    | <b>Peak 1:</b> 3.93 | 100.0    | 6.03       |
| <b>Zeta Deviation (mV):</b> 6.03    | <b>Peak 2:</b> 0.00 | 0.0      | 0.00       |
| <b>Conductivity (mS/cm):</b> 0.0622 | <b>Peak 3:</b> 0.00 | 0.0      | 0.00       |

**Result quality:** See result quality report

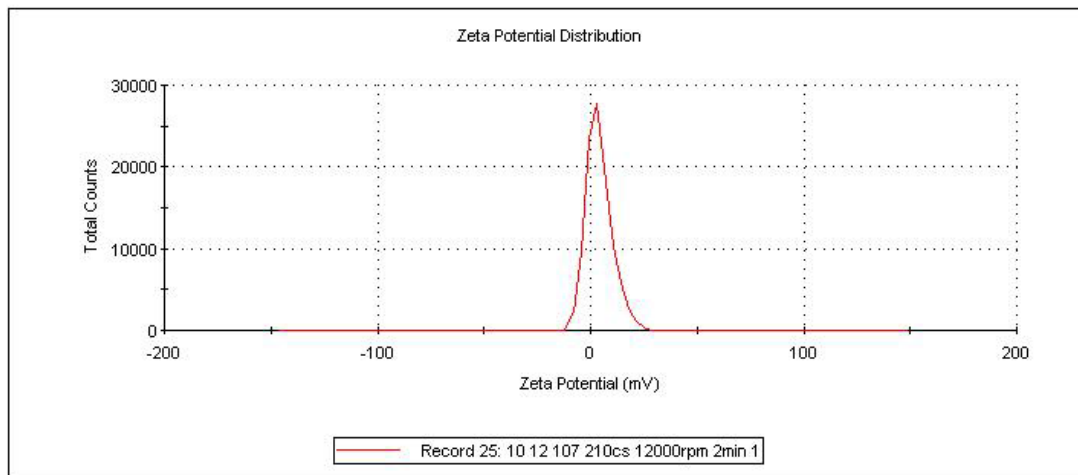

**Figure S4.** Zeta potential of PEGylated-DHLA-Ag<sub>2</sub>S QDs (3.93 mV).

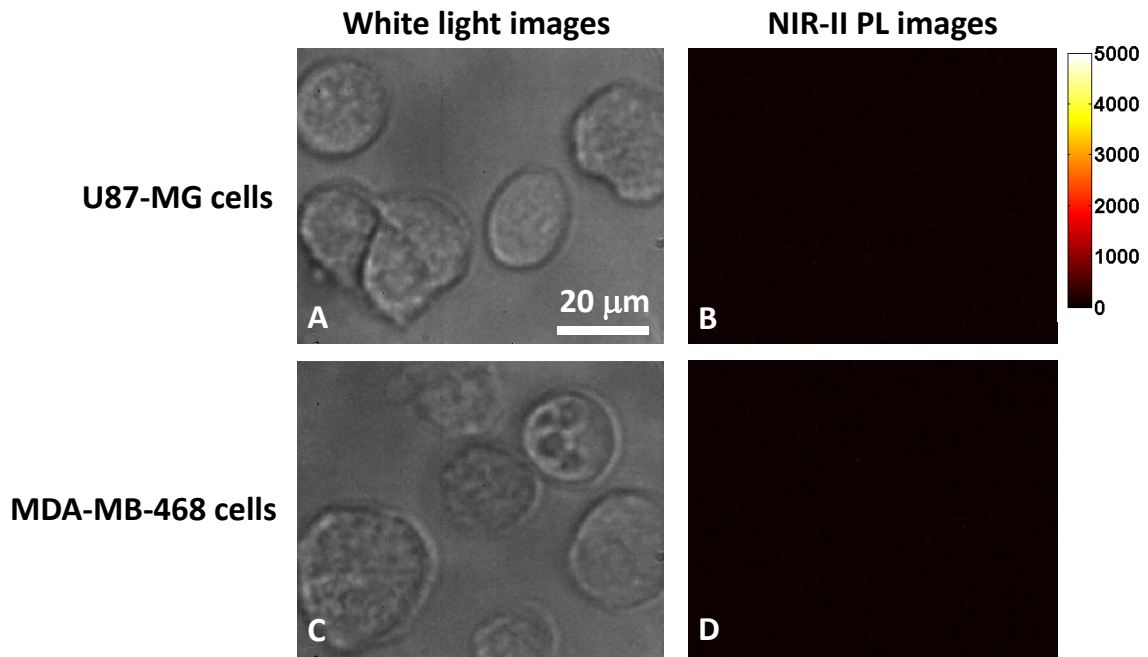

**Figure S5.** Negative control experiment of U87-MG and MDA-MB-468 cells stained with target-free, DHLA-Ag<sub>2</sub>S QDs. White light optical image (A) and NIR-II PL image (B) of U87-MG cells incubated in the presence of DHLA-Ag<sub>2</sub>S QDs. White light optical image (C) and NIR-II PL image (D) of MDA-MB-468 cells incubated in the presence of DHLA-Ag<sub>2</sub>S QDs.

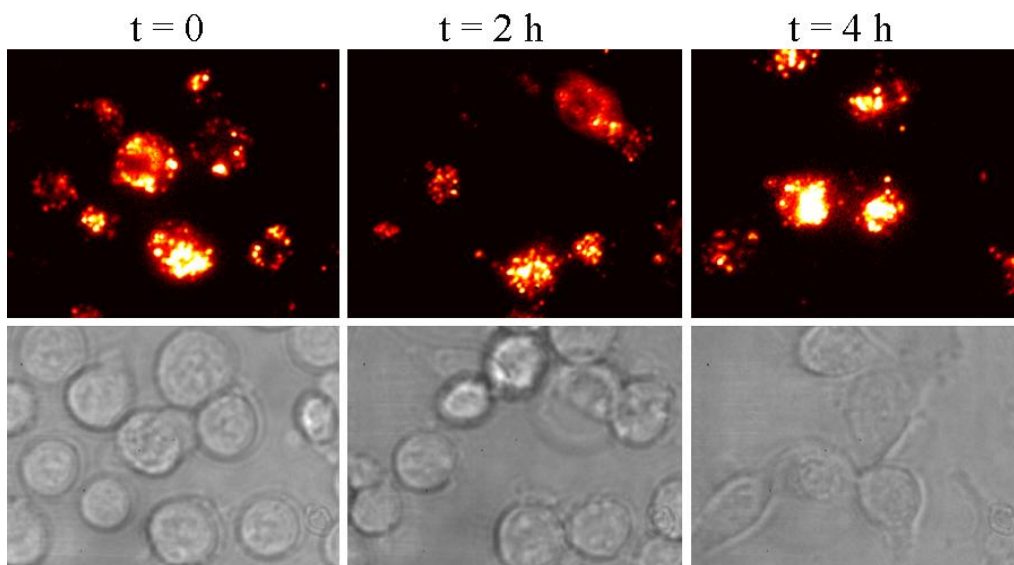

**Figure S6.** Long time *in situ* imaging of DHLA-Ag<sub>2</sub>S QD/RGD stained U87 MG cells at 37 °C with CO<sub>2</sub> flow of 0.4 L/min in cell medium.

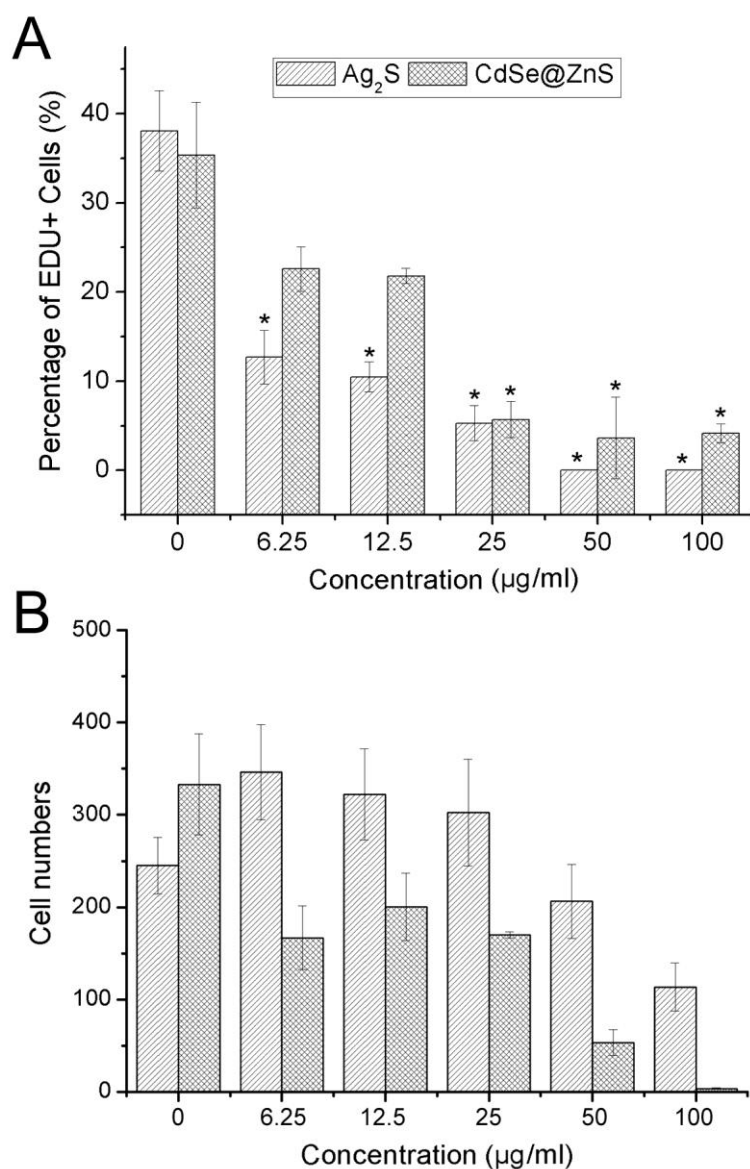

**Figure S7.** Effect of DHLA-Ag<sub>2</sub>S and MPA-CdSe@ZnS QDs on the U87 MG cells proliferation (\*: P < 0.05) (A) and the counted cells number (B) after 72 h treatment. From Figure S7A, it seemed that the DHLA-Ag<sub>2</sub>S QDs possess higher cytotoxicity in comparison with MPA-CdSe@ZnS QDs. However, it was not the truth. When we counted the cells number after incubating the U87 MG cells with DHLA-Ag<sub>2</sub>S and MPA-CdSe@ZnS QDs at different concentrations for 72 h, it was found that that most of the cells incubated with MPA-CdSe@ZnS QDs were killed at high concentrations such as 50 and 100 µg/mL. Instead, the live cells remained a much higher population in case of incubating with DHLA-Ag<sub>2</sub>S under the same conditions.

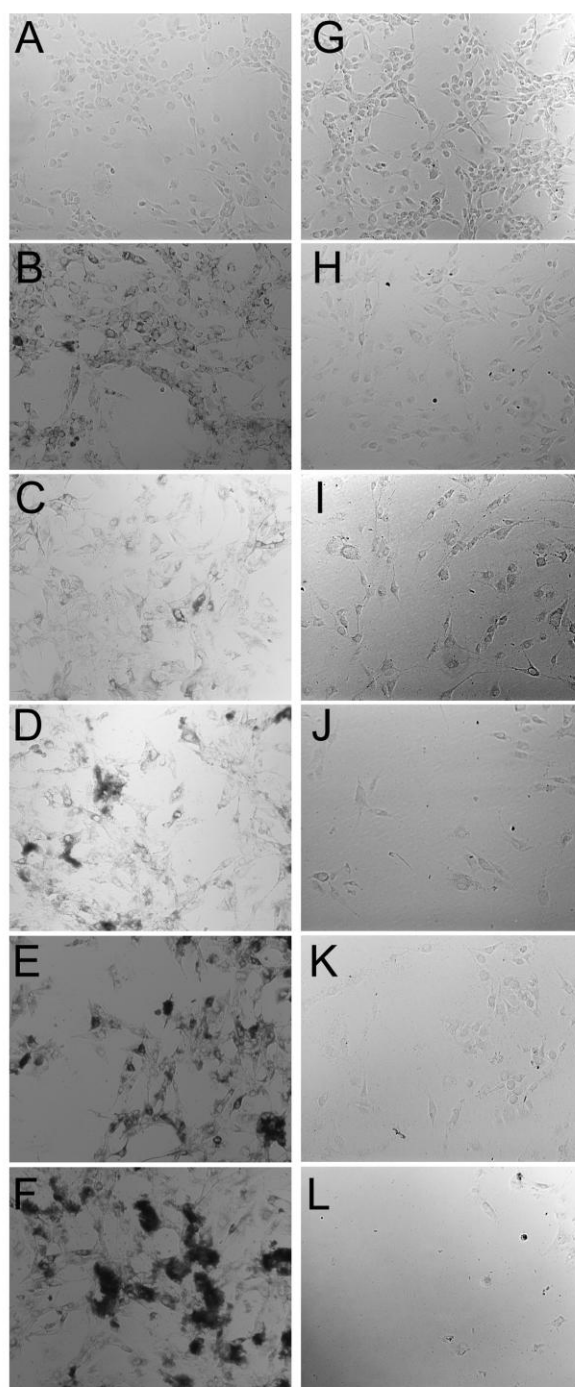

**Figure S8.** Optical images of U87 MG cells incubated with DHLA-Ag<sub>2</sub>S (A-F: 0, 6.25, 12.5, 25, 50, and 100 µg/mL) and MPA-CdSe@ZnS QDs (G-L: 0, 6.25, 12.5, 25, 50, and 100 µg/mL) after 72 h treatment. The cell culture media of DMEM caused the severe precipitation of DHLA-Ag<sub>2</sub>S surrounding the U87 MG cells, which resulted in that the U87 MG cells were treated at a much higher concentration of Ag<sub>2</sub>S indeed. So, what the truth is that the proliferation data in Figure S7A were underrated.



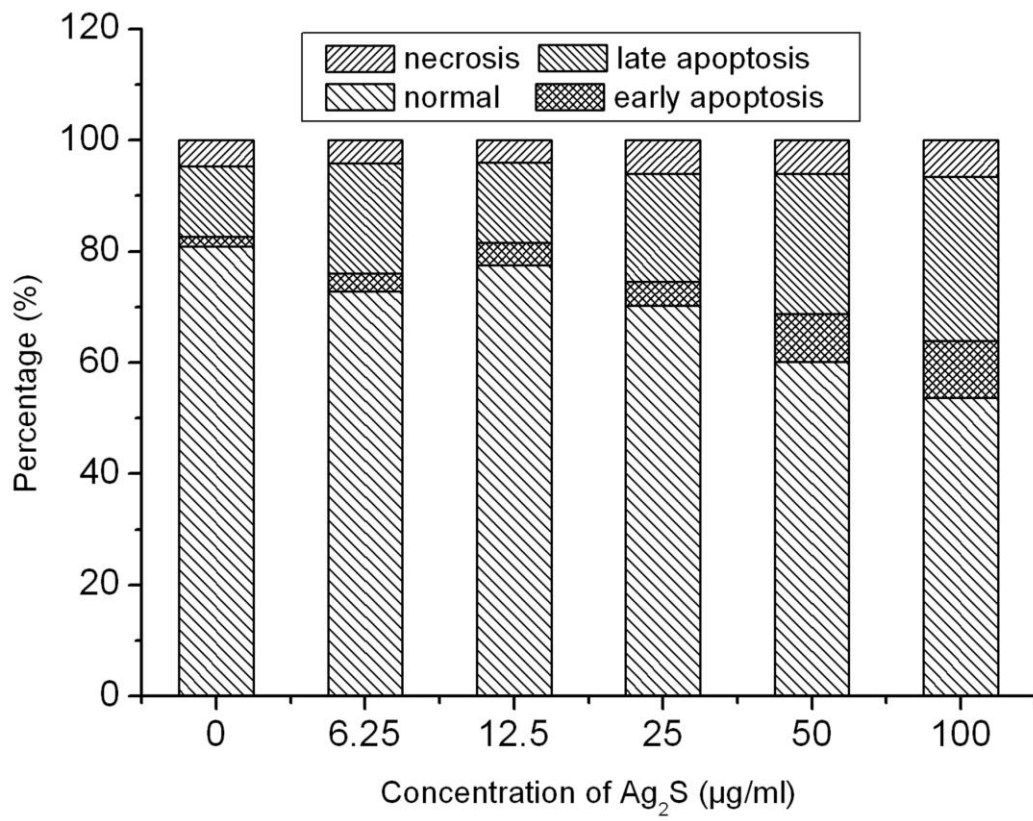

**Figure S9.** Effect of DHLA-Ag<sub>2</sub>S on the apoptosis and necrosis of U87 MG cells after 72 h treatment.

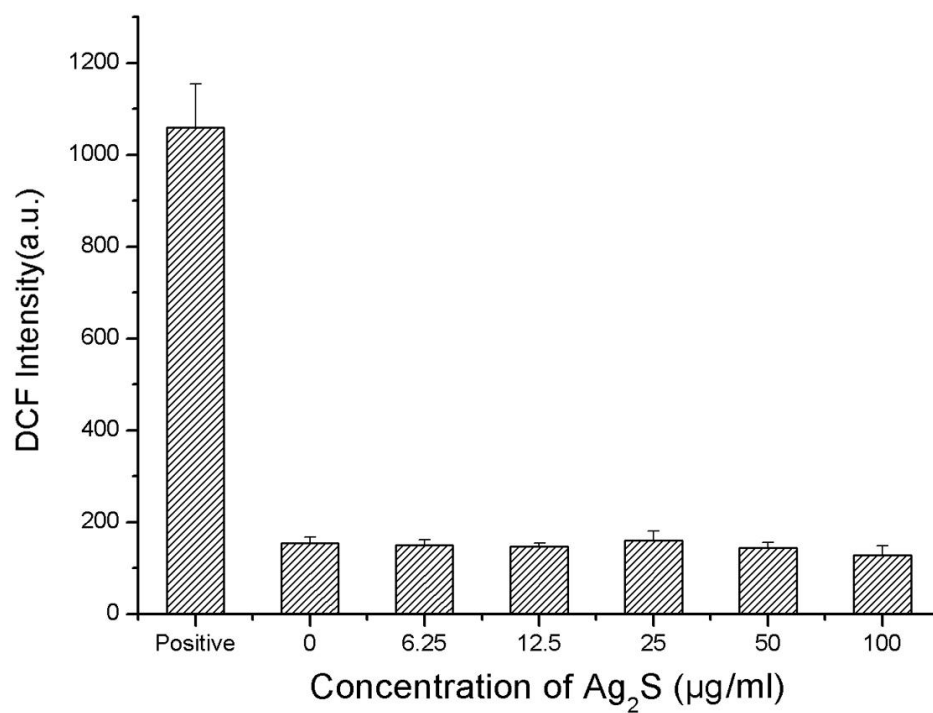

**Figure S10.** Effect of DHLA-Ag<sub>2</sub>S on the ROS production of U87 MG cells after 72 h treatment.

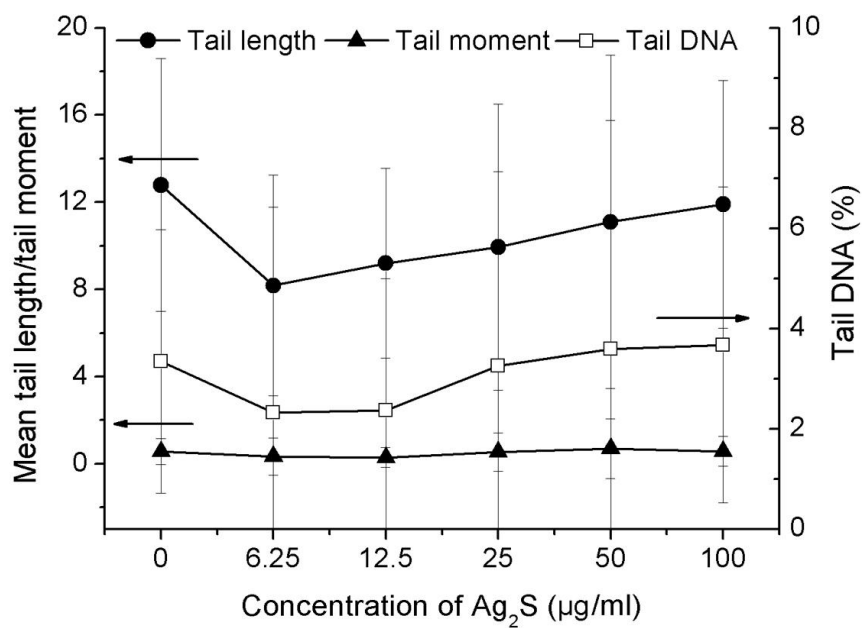

**Figure S11.** Comet assay of DHLA-Ag<sub>2</sub>S on the U87 MG cells after 72 h treatment.

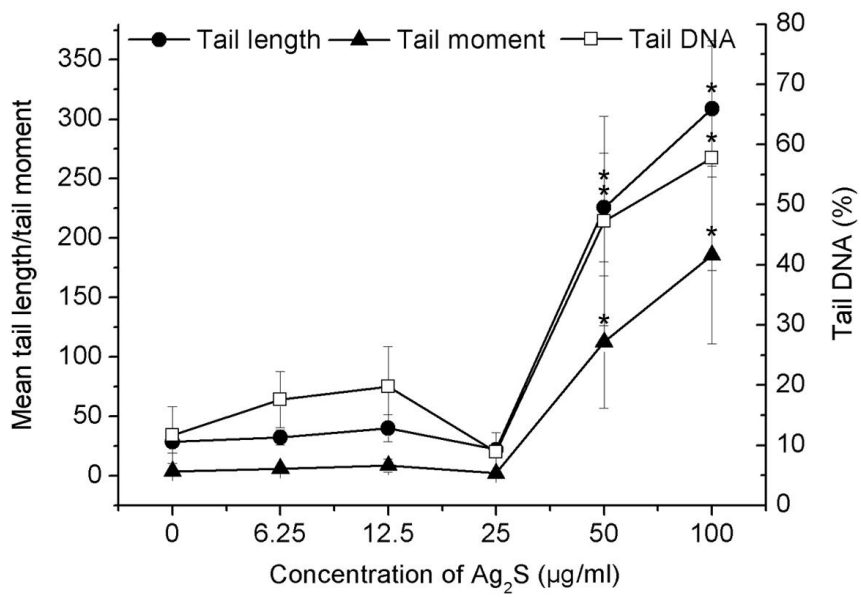

**Figure S12.** Comet assay of MPA-CdSe@ZnS QDs on the L929 cells after 72 h treatment (\*:  $P < 0.05$ ).

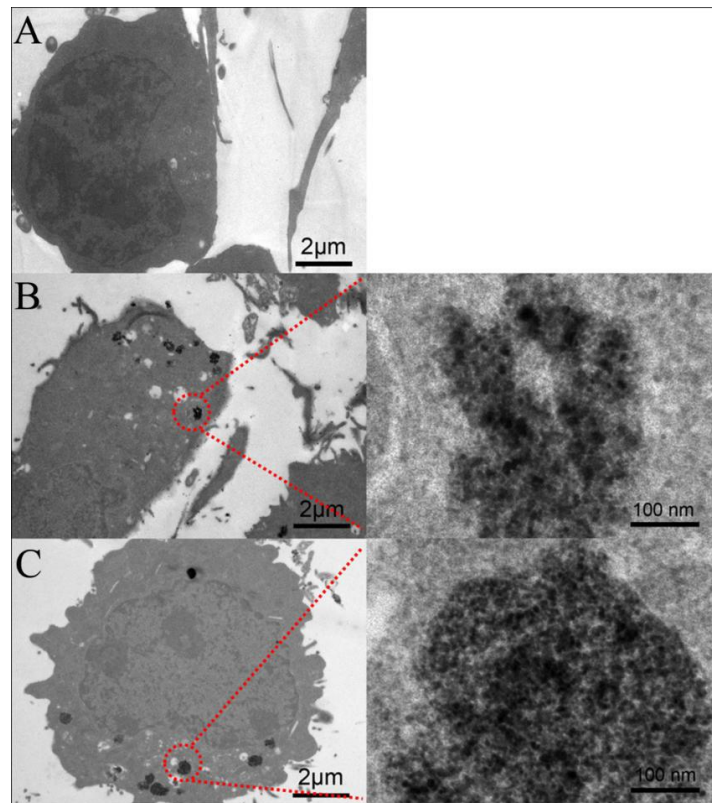

**Figure S13.** TEM images of the uptake of  $\text{Ag}_2\text{S}$  by L929 cell at different concentrations. A: 0  $\mu\text{g/mL}$ ; B: 12.5  $\mu\text{g/mL}$ ; C: 100  $\mu\text{g/mL}$ .
